# Supplementary material
Source: PubMed Central journal article supplement (PMC2527740)
Supplement: NIHMS61064-supplement-si20060314_062.pdf [file NIHMS61064-supplement-si20060314_062.pdf]

# Supporting Information

## Flexible 5-Guanidino-4-nitroimidazole DNA Lesions: Structures and Thermodynamics<sup>†</sup>

<sup>†</sup> This research is supported by NIH Grant CA-75449 to S. B. and NIH Grant ES-11589 to V. S. and N. E. G.

*Lei Jia<sup>‡</sup>, Vladimir Shafirovich<sup>‡</sup>, Robert Shapiro<sup>‡</sup>, Nicholas E. Geacintov<sup>‡</sup>, and Suse  
Broyde<sup>‡, §, \*</sup>*

<sup>‡</sup> Department of Chemistry, New York University, New York, New York 10003

<sup>§</sup> Department of Biology, New York University, New York, New York 10003

E-mail address: [broyde@nyu.edu](mailto:broyde@nyu.edu)

**Running title:** Simulation of 5-Guanidino-4-nitroimidazole damaged DNA

\*Corresponding author: Suse Broyde: tel. (212)998-8231, fax (212)995-4015, e-mail  
[broyde@nyu.edu](mailto:broyde@nyu.edu)

## Figure Legends

Figure S1: Representative starting models for the MD simulations: NI(*anti*)•C(*anti*) and NI(*syn*)•C(*anti*). The NI is colored by atom. The partner C is pink. The other duplexes differ only in the partner base. Hydrogens have been removed for clarity.

Figure S2: Stereo views of geometry-optimized NI nucleosides whose energies are between 6.6 and 14.4 kcal/mol.

Figure S3: RMSD vs time plot for each molecular dynamics simulation.

Figure S4: Stereo views of the central 5-mer of the NI trajectory-average duplex structures. Relative energies are given in Table 3. The NI base is colored by atom. The NI base partners are colored as yellow (A), pink (C), purple (G), and orange (T). The NI adjacent bases C5 and C7 are also marked. The view is into the major groove. All stereo figures are prepared for viewing with a stereoviewer.

Figure S5: Hydrogen bonds (black lines) between NI and partner base. Relative energies are given in Table 3. The base pairs are obtained from the trajectory average structures of the selected simulation window. Hydrogen bonds shown have occupancy greater than 50%.

Figure S6: Average bend angles of all NI damaged DNA duplexes. Energetically favored structures (Table 3) are designated by colored asterisks.

Figure S7: Major and minor groove dimensions of all NI damaged DNA duplexes. Energetically favored structures (Table 3) are designated by colored asterisks.

Figure S8: Torsion angles  $\delta$ ,  $\theta$ , and  $\chi$  and sugar pucker pseudorotation angle  $\mathbf{P}$  vs time plots for each molecular dynamics simulation. Energetically favored structures (Table 3) are designated in red.

**NI(*anti*) · C(*anti*)**

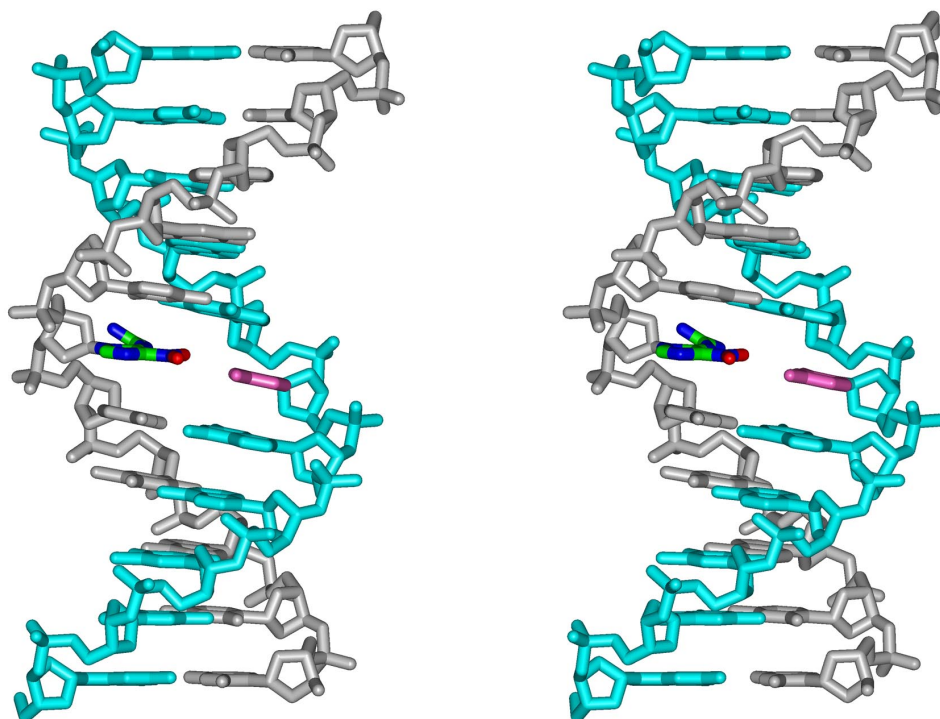

**NI(*syn*) · C(*anti*)**

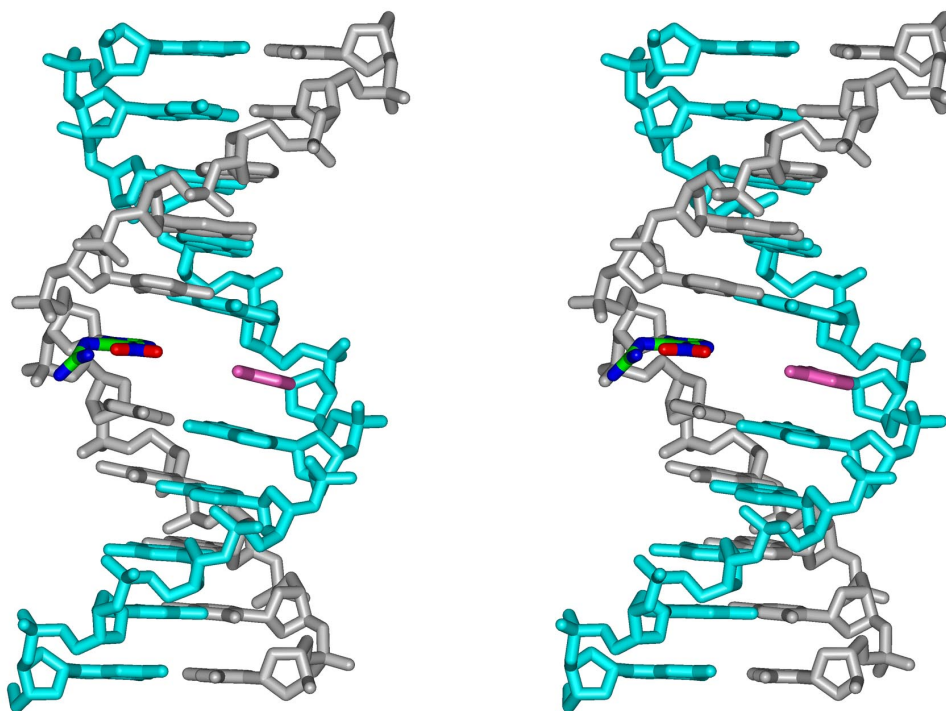

Figure S1

$\chi = 238^\circ, P = 171^\circ, \theta = 301^\circ, \delta = 196^\circ$

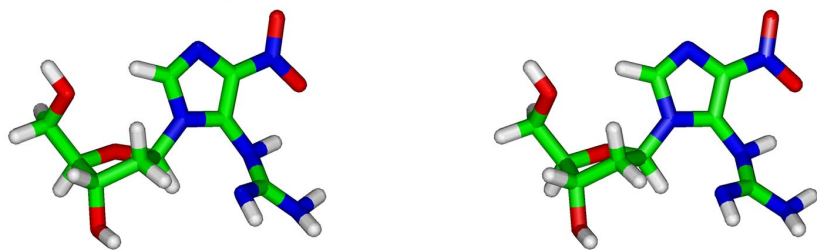

$\chi = 216^\circ, P = 164^\circ, \theta = 55^\circ, \delta = 169^\circ$

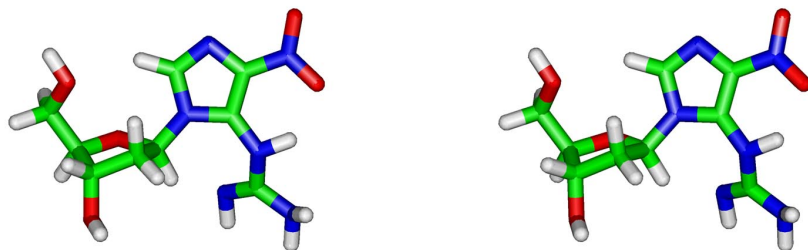

$\chi = 59^\circ, P = 149^\circ, \theta = 125^\circ, \delta = 152^\circ$

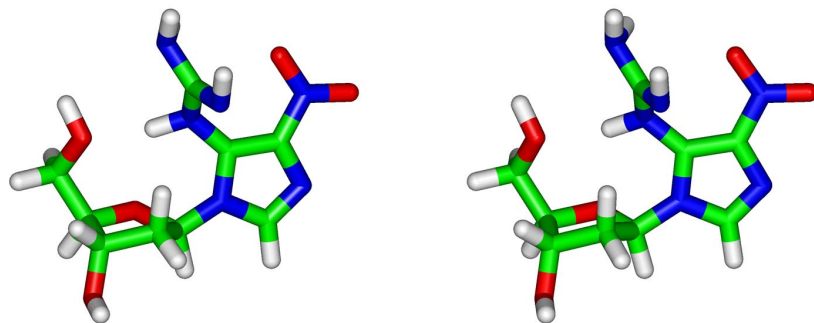

$\chi = 51^\circ, P = 155^\circ, \theta = -125^\circ, \delta = -174^\circ$

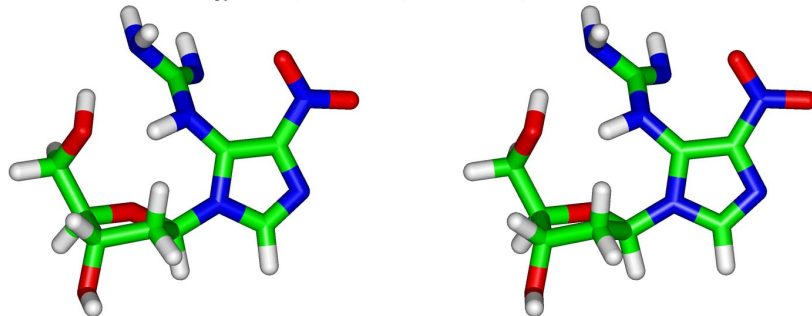

$\chi = 58^\circ, P = 133^\circ, \theta = 126^\circ, \delta = 180^\circ$

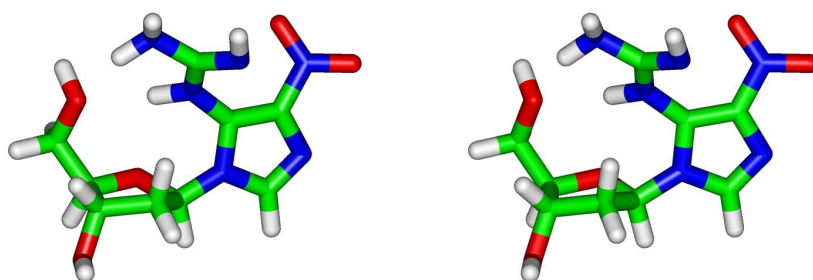

Figure S2

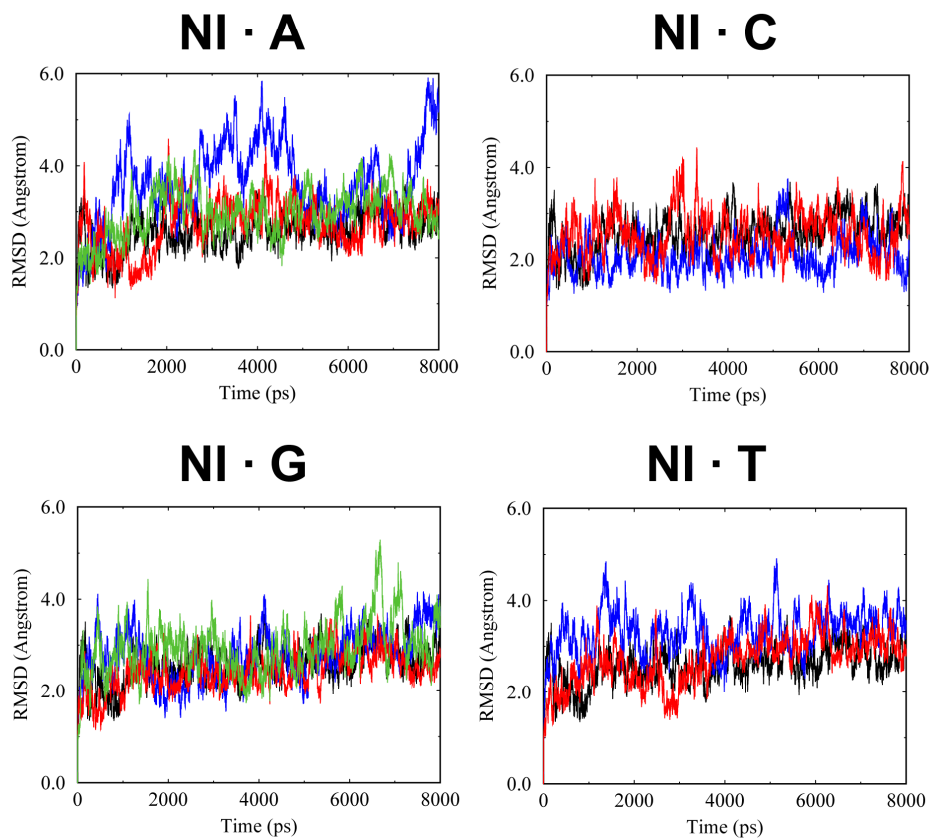

**Color Code: Unmodified Control  $NI(anti) \cdot X(anti)$**   
 **$NI(syn) \cdot X(anti)$   $NI(anti) \cdot X(syn)$**   
 **$X = A, C, G, \text{ or } T$**

Figure S3

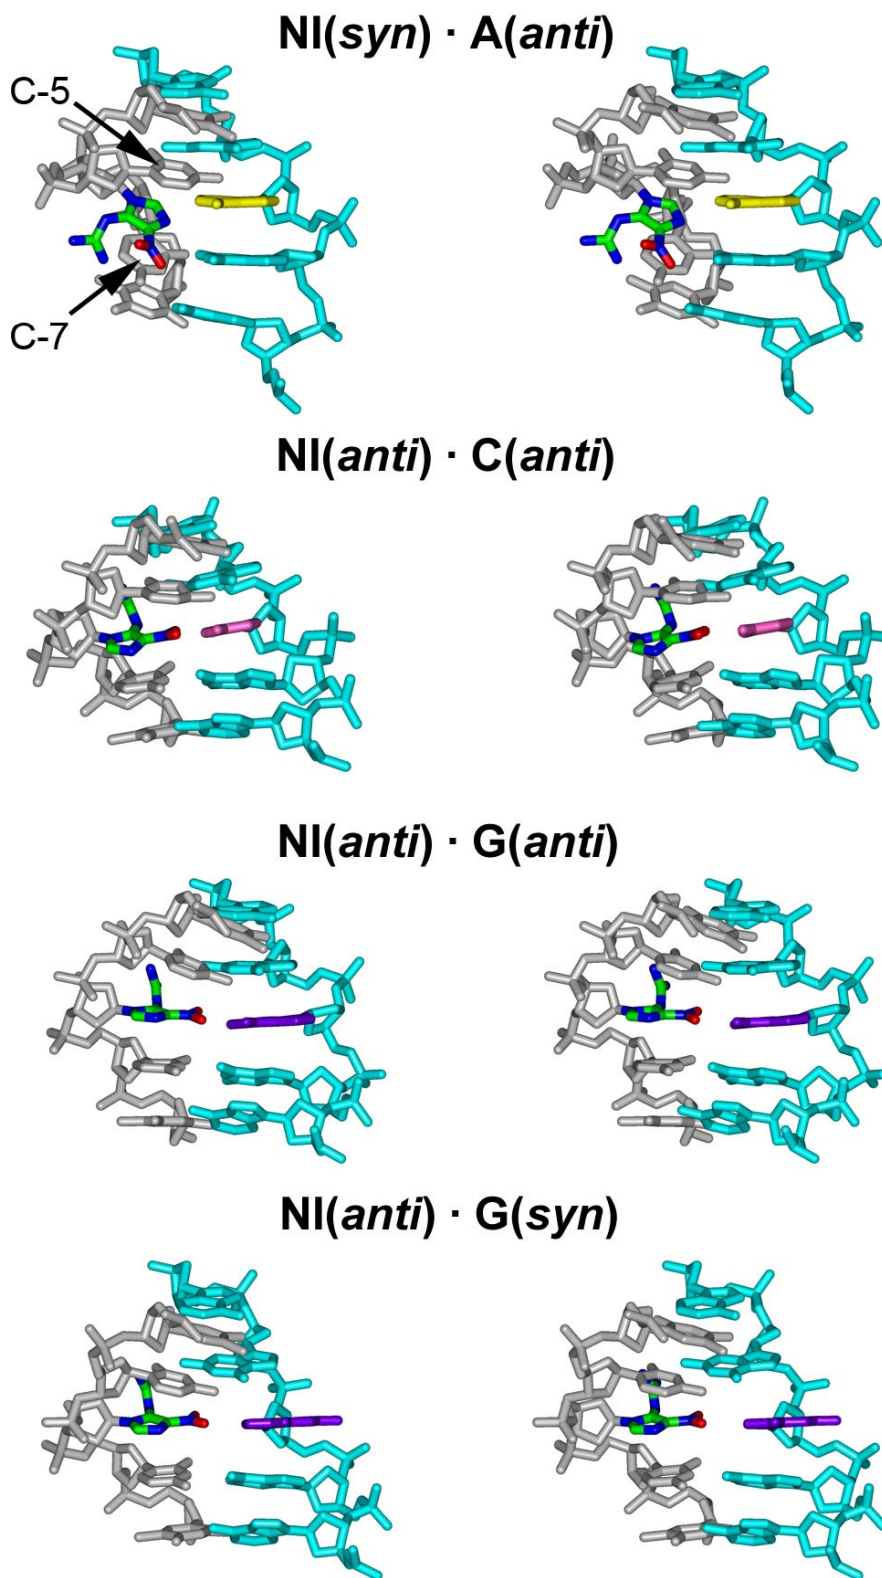

Figure S4

**NI(*syn*) · A(*anti*)**

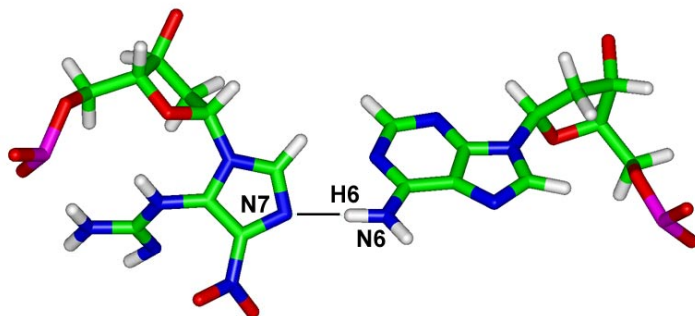

**NI(*anti*) · C(*anti*)**

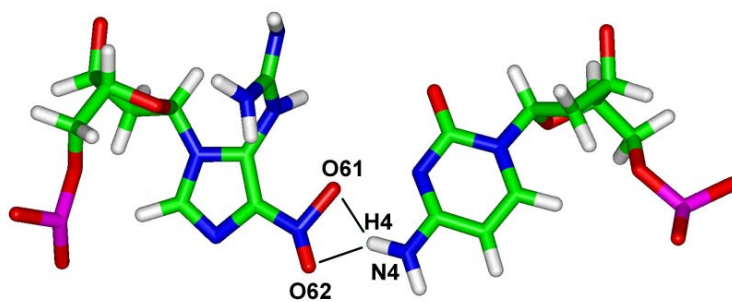

**NI(*anti*) · G(*anti*)**

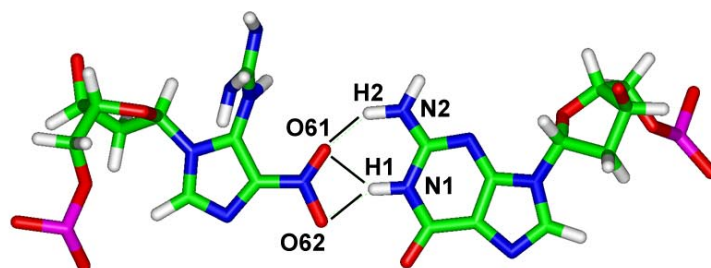

**NI(*anti*) · G(*syn*)**

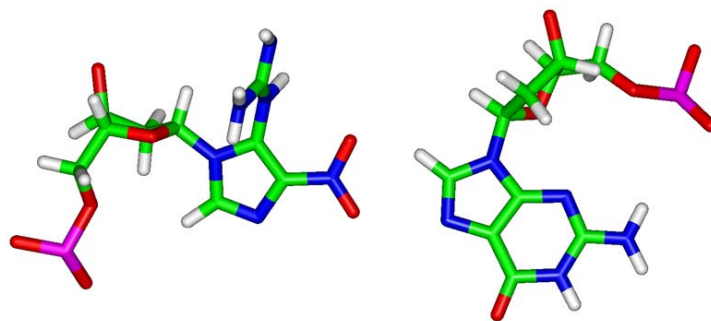

Figure S5



## Average bend angles

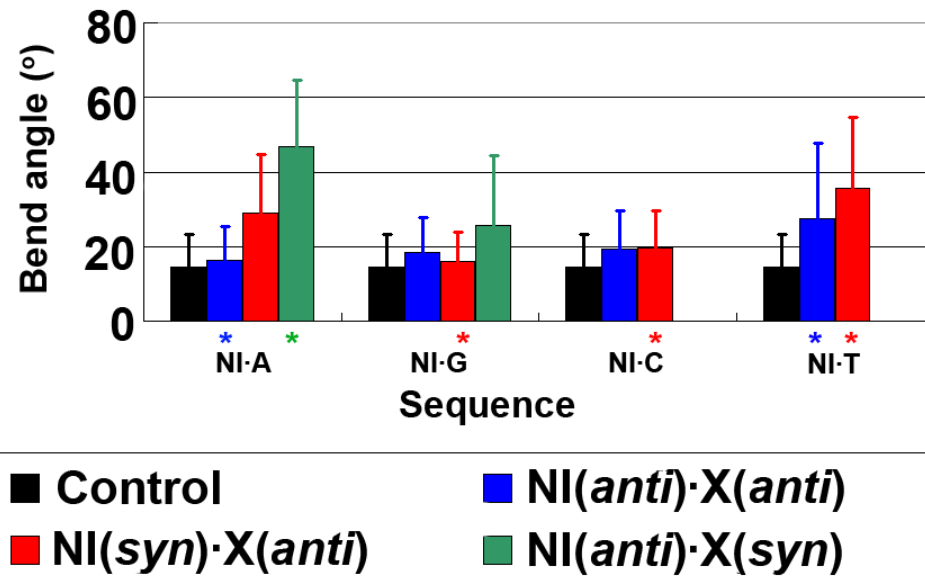

Figure S6

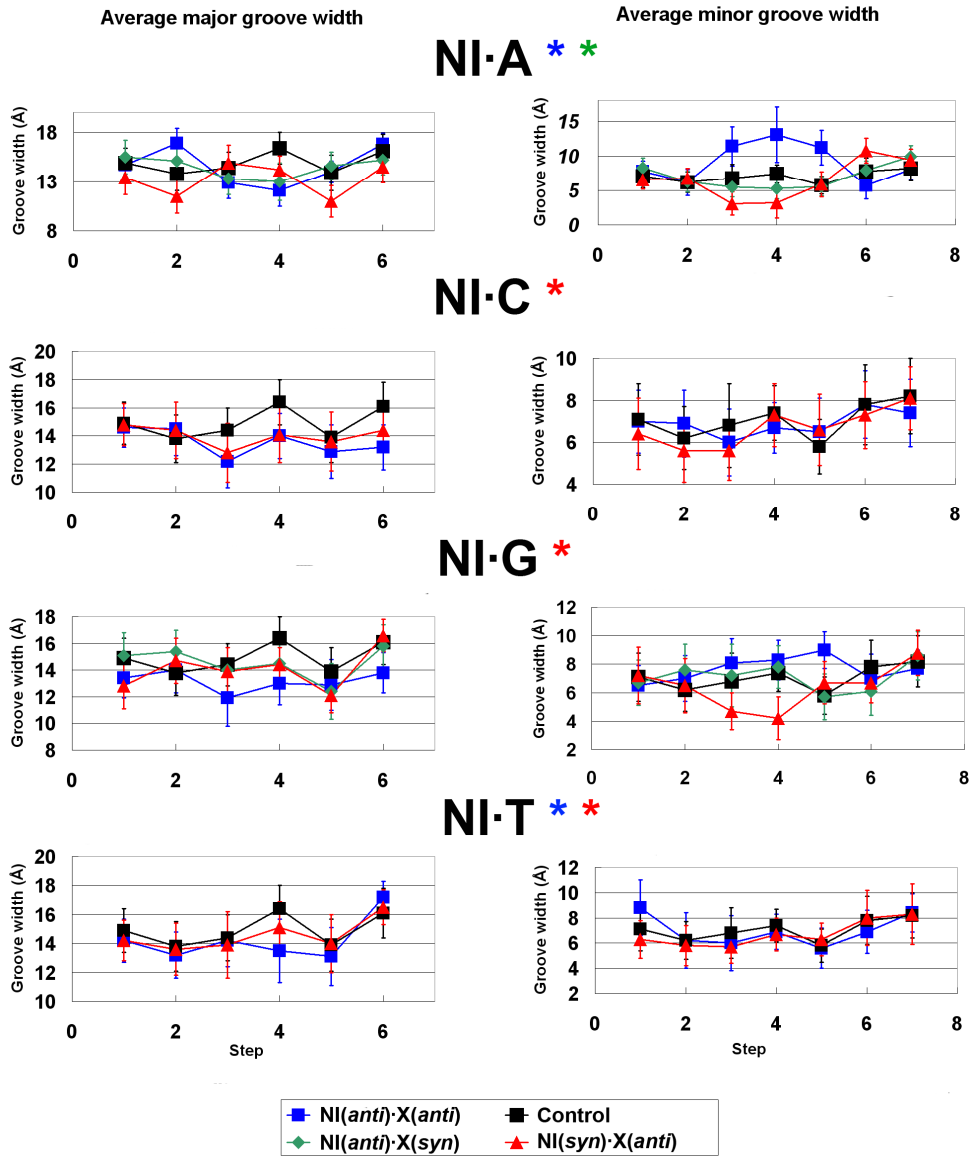

Figure S7

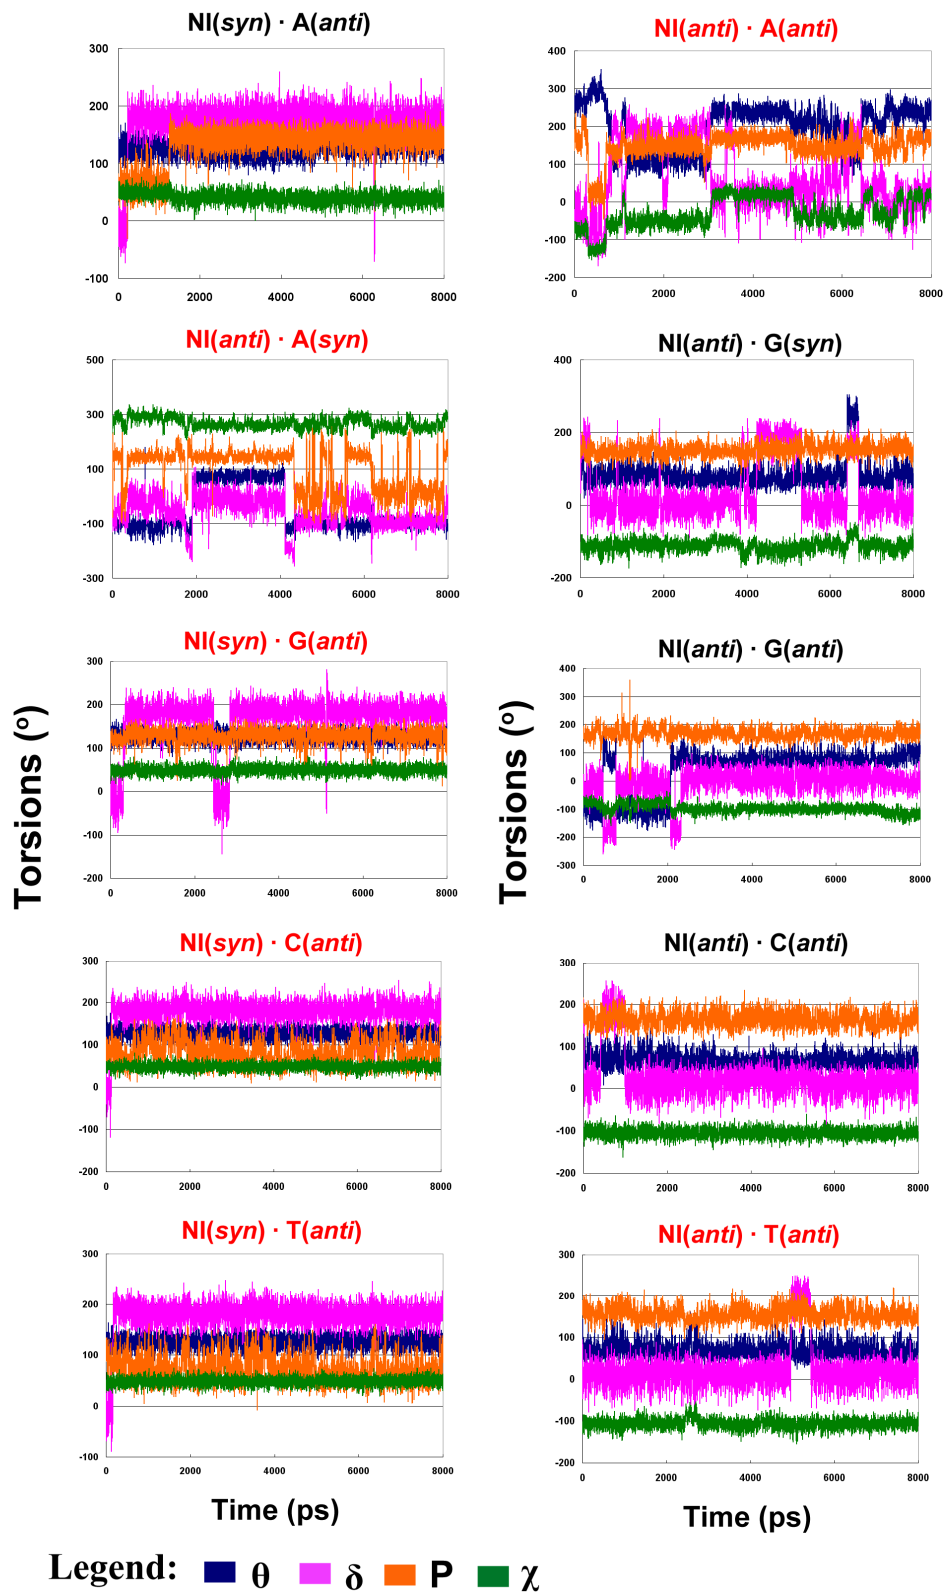

Figure S8

Table S1: Values of torsions for NI employed in duplex initial models

|                                         | $\chi$ (°) | $\theta$ (°) | $\delta$ (°) |
|-----------------------------------------|------------|--------------|--------------|
| <b>NI(<i>anti</i>) · A(<i>anti</i>)</b> | <b>154</b> | <b>15</b>    | <b>195</b>   |
| <b>NI(<i>anti</i>) · A(<i>syn</i>)</b>  | <b>154</b> | <b>15</b>    | <b>195</b>   |
| <b>NI(<i>anti</i>) · C(<i>anti</i>)</b> | <b>154</b> | <b>15</b>    | <b>195</b>   |
| <b>NI(<i>anti</i>) · G(<i>anti</i>)</b> | <b>154</b> | <b>15</b>    | <b>195</b>   |
| <b>NI(<i>anti</i>) · G(<i>syn</i>)</b>  | <b>154</b> | <b>15</b>    | <b>195</b>   |
| <b>NI(<i>anti</i>) · T(<i>anti</i>)</b> | <b>157</b> | <b>15</b>    | <b>195</b>   |
| <b>NI(<i>syn</i>) · A(<i>anti</i>)</b>  | <b>84</b>  | <b>135</b>   | <b>0</b>     |
| <b>NI(<i>syn</i>) · C(<i>anti</i>)</b>  | <b>93</b>  | <b>135</b>   | <b>68</b>    |
| <b>NI(<i>syn</i>) · G(<i>anti</i>)</b>  | <b>84</b>  | <b>135</b>   | <b>0</b>     |
| <b>NI(<i>syn</i>) · T(<i>anti</i>)</b>  | <b>84</b>  | <b>135</b>   | <b>0</b>     |

Table S2: Added force field parameters for the NI lesion

| Atom Parameters          |                                                            |                                                         |                                   |                 |
|--------------------------|------------------------------------------------------------|---------------------------------------------------------|-----------------------------------|-----------------|
| Atom Type                | Atomic Mass                                                | Polarizability( $\text{\AA}^3$ )                        |                                   |                 |
| NO                       | 14.01                                                      | 0.53                                                    |                                   |                 |
| Bond Parameters          |                                                            |                                                         |                                   |                 |
| Bond                     | Force Constant $K_r$ (kcal mol $^{-1}$ $\text{\AA}^{-2}$ ) | Equilibrium Bond Length $r_{eq}$ ( $\text{\AA}$ )       |                                   |                 |
| CD-N*                    | 506.4                                                      | 1.33                                                    |                                   |                 |
| CC-CD                    | 522.6                                                      | 1.40                                                    |                                   |                 |
| CC-NO                    | 327.6                                                      | 1.42                                                    |                                   |                 |
| NO-O2                    | 761.2                                                      | 1.23                                                    |                                   |                 |
| CD-N2                    | 449.0                                                      | 1.37                                                    |                                   |                 |
| Angle Parameters         |                                                            |                                                         |                                   |                 |
| Angle                    | Force Constant $K_\theta$ (kcal mol $^{-1}$ rad $^{-2}$ )  | Equilibrium Bond Angle $\theta_{eq}$ ( $^\circ$ )       |                                   |                 |
| CT-N*-CD                 | 67.6                                                       | 120.3                                                   |                                   |                 |
| CK-N*-CD                 | 68.6                                                       | 106.9                                                   |                                   |                 |
| CK-NB-CC                 | 70.5                                                       | 104.6                                                   |                                   |                 |
| NB-CC-CD                 | 71.0                                                       | 111.2                                                   |                                   |                 |
| NB-CC-NO                 | 68.6                                                       | 124.2                                                   |                                   |                 |
| CD-CC-NO                 | 67.6                                                       | 124.6                                                   |                                   |                 |
| CC-NO-O2                 | 69.3                                                       | 120.0                                                   |                                   |                 |
| O2-NO-O2                 | 76.4                                                       | 120.0                                                   |                                   |                 |
| CC-CD-N2                 | 68.4                                                       | 129.9                                                   |                                   |                 |
| CC-CD-N*                 | 71.0                                                       | 104.8                                                   |                                   |                 |
| CD-N2-H                  | 49.0                                                       | 120.0                                                   |                                   |                 |
| CD-N2-CD                 | 65.5                                                       | 120.0                                                   |                                   |                 |
| N2-CD-N*                 | 72.6                                                       | 120.0                                                   |                                   |                 |
| N2-CD-N2                 | 73.3                                                       | 120.0                                                   |                                   |                 |
| CD-N*-H                  | 52.6                                                       | 111.7                                                   |                                   |                 |
| Torsional Parameters     |                                                            |                                                         |                                   |                 |
| Torsion                  | Number of paths                                            | Torsion Barrier $V_n/2$ (kcal mol $^{-1}$ )             | Phase Angle $\gamma$ ( $^\circ$ ) | Periodicity $n$ |
| X -N*-CD-X               | 2                                                          | 9.5                                                     | 180                               | 2               |
| X -CC-CD-X               | 4                                                          | 16.0                                                    | 180                               | 2               |
| X -NB-CC-X               | 2                                                          | 9.5                                                     | 180                               | 2               |
| X -CC-NO-X               | 4                                                          | 3.0                                                     | 180                               | 2               |
| X -N2-CD-X               | 4                                                          | 2.7                                                     | 180                               | 2               |
| Improper Torsions        |                                                            |                                                         |                                   |                 |
| Torsion                  | Torsion Barrier $V_n/2$ (kcal mol $^{-1}$ )                | Phase Angle $\gamma$ ( $^\circ$ )                       | Periodicity $n$                   |                 |
| CC-O2-NO-O2              | 10.5                                                       | 180                                                     | 2                                 |                 |
| Van der Waals Parameters |                                                            |                                                         |                                   |                 |
| Atom Type                | Van der Waals R ( $\text{\AA}$ )                           | Van der Waals Well Depth $\epsilon$ (kcal mol $^{-1}$ ) |                                   |                 |
| NO                       | 1.824                                                      | 0.17                                                    |                                   |                 |

Table S3: AMBER atom type, connection type, and partial charge assignments for the NI lesion<sup>a</sup>.

| Atom Name | Atom Type | Connection Type | Partial Charge |
|-----------|-----------|-----------------|----------------|
| P         | P         | M               | 1.221333       |
| O1P       | O2        | E               | -0.79232       |
| O2P       | O2        | E               | -0.79232       |
| O5'       | OS        | M               | -0.5057        |
| C5'       | CT        | M               | -0.02002       |
| H5'1      | H1        | E               | 0.092955       |
| H5'2      | H1        | E               | 0.092955       |
| C4'       | CT        | M               | 0.055017       |
| H4'       | H1        | E               | 0.14164        |
| O4'       | OS        | E               | -0.24723       |
| C3'       | CT        | M               | 0.07792        |
| H3'       | H1        | E               | 0.116204       |
| C2'       | CT        | 3               | -0.11809       |
| H2'1      | HC        | E               | 0.062163       |
| H2'2      | HC        | E               | 0.062163       |
| C1'       | CT        | B               | 0.00508        |
| H1'       | H2        | E               | 0.192481       |
| N9        | N* (nd)   | S               | 0.064975       |
| C8        | CK (cd)   | B               | 0.100283       |
| H8        | H5 (h5)   | E               | 0.194863       |
| N7        | NB (nc)   | S               | -0.54865       |
| C5        | CC (cc)   | B               | 0.238038       |
| N6        | NO (no)   | B               | 0.617587       |
| O61       | O2 (o)    | E               | -0.50899       |
| O62       | O2 (o)    | E               | -0.38634       |
| C4        | CD (cd)   | S               | 0.038302       |
| N3        | N2 (nh)   | B               | -0.38224       |
| H3        | H (hn)    | E               | 0.351142       |
| C2        | CD (c2)   | B               | 0.606928       |
| N1        | N* (n2)   | S               | -0.6783        |
| H1        | H (hn)    | E               | 0.321915       |
| N2        | N2 (na)   | B               | -0.90549       |
| H21       | H (hn)    | E               | 0.383818       |
| H22       | H (hn)    | E               | 0.383818       |
| O3'       | OS        | M               | -0.5359        |

<sup>a</sup>: Analogous atom types from the GAFF (59) force field are shown in parentheses. Torsional parameters in Table S2 were taken from GAFF.

Table S4: Box sizes and numbers of waters in MD simulation initial models<sup>a</sup>.

|                             | NI( <i>syn</i> )•X( <i>anti</i> )        | NI( <i>anti</i> )•X( <i>anti</i> )       | NI( <i>anti</i> )•X( <i>syn</i> )        |
|-----------------------------|------------------------------------------|------------------------------------------|------------------------------------------|
| NI•A                        | 50Å x 55Å x 67Å<br>4206 H <sub>2</sub> O | 50Å x 50Å x 67Å<br>3791 H <sub>2</sub> O | 50Å x 51Å x 67Å<br>3874 H <sub>2</sub> O |
| NI•C                        | 50Å x 51Å x 67Å<br>3874 H <sub>2</sub> O | 50Å x 50Å x 67Å<br>3790 H <sub>2</sub> O |                                          |
| NI•G                        | 49Å x 55Å x 67Å<br>4097 H <sub>2</sub> O | 49Å x 51Å x 67Å<br>3758 H <sub>2</sub> O | 49Å x 50Å x 67Å<br>3680 H <sub>2</sub> O |
| NI•T                        | 49Å x 51Å x 67Å<br>3756 H <sub>2</sub> O | 49Å X 51Å x 67Å<br>3757 H <sub>2</sub> O |                                          |
| G•C<br>(Unmodified Control) |                                          | 50Å x 50Å x 67Å<br>3789 H <sub>2</sub> O |                                          |

<sup>a</sup>: X is A, C, G, or T.

Table S5: Trajectories (ps) employed for thermodynamic and structural analyses <sup>a</sup>.

|                             | NI( <i>syn</i> )•X( <i>anti</i> ) | NI( <i>anti</i> )•X( <i>anti</i> ) | NI( <i>anti</i> )•X( <i>syn</i> )         |
|-----------------------------|-----------------------------------|------------------------------------|-------------------------------------------|
| NI•A                        | 4000-7000                         | 3200-6200                          | 5000-8000                                 |
| NI•C                        | 4000-7000                         | 2000-5000                          |                                           |
| NI•G                        | 3000-6000                         | 3000-6000                          | 2100-3100,<br>5400-6400, and<br>7000-8000 |
| NI•T                        | 4000-7000                         | 2900-4900 and<br>6000-7000         |                                           |
| G•C<br>(Unmodified Control) |                                   | 3000-6000                          |                                           |

<sup>a</sup>: X is A, C, G, or T.



Table S6: Hydrogen bonds and occupancies involving NI<sup>a</sup>.

| Sequence                             | Hydrogen bond and occupancy involving NI (%) |                        |                        |
|--------------------------------------|----------------------------------------------|------------------------|------------------------|
| Control                              | (G6)N2-H21...O2(C17)                         | (G6)N1-H1...N3(C17)    | (C17)N4-H42...O6(G6)   |
|                                      | 99.3                                         | 99.7                   | 96.1                   |
| NI( <i>syn</i> ) • A( <i>anti</i> )  | (NI6)N7...H61-N6(A17)                        | (NI6)O2P...H22-N2(NI6) | (NI6)O4'...H3-N3(NI6)  |
|                                      | 55.8                                         | 54.8                   | 54.8                   |
|                                      | (NI6)O61...H1-N1(G16)                        | (C5)O3'...H3-N3(NI6)   |                        |
|                                      | 76.1                                         | 89.4                   |                        |
| NI( <i>syn</i> ) • C( <i>anti</i> )  | (NI6)N7...H41-N4(C17)                        | (NI6)O2P...H22-N2(NI6) | (NI6)O5'...H3-N3(NI6)  |
|                                      | 74.7                                         | 59.2                   | 67.4                   |
|                                      | (NI6)O4'...H3-N3(NI6)                        |                        |                        |
|                                      | 70.4                                         |                        |                        |
| NI( <i>syn</i> ) • G( <i>anti</i> )  | (NI6)N7...H21-N2(G17)                        | (NI6)O62...H1-N1(G17)  | (NI6)O2P...H22-N2(NI6) |
|                                      | 94.7                                         | 87.0                   | 59.2                   |
|                                      | (NI6)O4'...H3-N3(NI6)                        | (C5)O3'...H3-N3(NI6)   |                        |
|                                      | 59.4                                         | 64.5                   |                        |
| NI( <i>syn</i> ) • T( <i>anti</i> )  | (NI6)O5'...H3-N3(NI6)                        | (NI6)O4'...H3-N3(NI6)  |                        |
|                                      | 84.8                                         | 67.9                   |                        |
| NI( <i>anti</i> ) • A( <i>anti</i> ) | (NI6)O62...H61-N6(A17)                       |                        |                        |
|                                      | 58.9                                         |                        |                        |
| NI( <i>anti</i> ) • A( <i>syn</i> )  | (A17)N7...H1-N1(NI6)                         | (NI6)O61...H21-N2(NI6) |                        |
|                                      | 63.8                                         | 62.1                   |                        |
| NI( <i>anti</i> ) • C( <i>anti</i> ) | (NI6)O61...H41-N4(C17)                       | (NI6)O62...H41-N4(C17) |                        |
|                                      | 91.6                                         | 57.3                   |                        |
| NI( <i>anti</i> ) • G( <i>anti</i> ) | (NI6)O61...H21-N2(G17)                       | (NI6)O61...H1-N1(G17)  | (NI6)O62...H1-N1(G17)  |
|                                      | 97.2                                         | 71.7                   | 82.4                   |
| NI( <i>anti</i> ) • G( <i>syn</i> )  |                                              |                        |                        |
| NI( <i>anti</i> ) • T( <i>anti</i> ) | (NI6)O61...H3-N3(T17)                        | (NI6)O62...H3-N3(T17)  |                        |
|                                      | 80.3                                         | 51.6                   |                        |

<sup>a</sup>: Summed values are totals for the indicated hydrogen bonds. Only hydrogen bonds with occupancy greater than 50% are listed.

Table S7: MM-PBSA free energy analysis components<sup>a</sup> for each DNA duplex (kcal/mol).

|                                       | NI(syn)•A(anti) | NI(anti)•A(anti) | NI(anti)•A(syn) | NI(syn)•C(anti) | NI(anti)•C(anti) |
|---------------------------------------|-----------------|------------------|-----------------|-----------------|------------------|
| E <sub>elec</sub>                     | 453.0(50.7)     | 367.4(55.3)      | 299.9(33.6)     | 262.2(51.9)     | 273.3(44.0)      |
| E <sub>vdw</sub>                      | -207.1(10.0)    | -200.3(9.49)     | -199.2(8.6)     | -196.8(10.2)    | -197.1(9.6)      |
| E <sub>int</sub>                      | 1030.0(20.7)    | 1032.9(22.9)     | 1031.7(19.7)    | 1023.1(18.8)    | 1033.4(20.6)     |
| E <sub>MM</sub>                       | 1275.9(50.3)    | 1200.0(57.2)     | 1132.4(37.7)    | 1088.5(53.3)    | 1109.6(41.0)     |
| G <sub>nonpolar</sub>                 | 19.2(0.3)       | 19.4(0.2)        | 19.5(0.2)       | 19.3(0.2)       | 19.36(0.2)       |
| G <sub>PB</sub>                       | -5812.8(47.3)   | -5739.4(52.7)    | -5673.8(30.6)   | -5716.3(47.1)   | -5731.7(38.1)    |
| G <sub>sol</sub>                      | -5793.7(47.4)   | -5720.0(52.8)    | -5654.3(30.6)   | -5696.9(47.2)   | -5712.3(38.2)    |
| <G <sub>PB</sub> +E <sub>elec</sub> > | -5359.9(13.4)   | -5372.0(11.3)    | -5373.9(10.8)   | -5454.1(11.9)   | -5458.3(12.9)    |
| <E <sub>MM</sub> +G <sub>sol</sub> >  | -4517.8(17.3)   | -4520.1(20.4)    | -4521.8(20.0)   | -4608.4(18.8)   | -4602.7(16.4)    |
| -TS                                   | 570.1(2.6)      | 581.1(0.9)       | 580.8(2.0)      | 575.4(1.75)     | 574.2(1.0)       |
| G <sub>tot</sub>                      | -5087.8(19.9)   | -5101.2(21.3)    | -5102.6(22.0)   | -5183.8(20.6)   | -5176.9(17.4)    |

|                                       | NI(syn)•G(anti) | NI(anti)•G(anti) | NI(anti)•G(syn) | NI(syn)•T(anti) | NI(anti)•T(anti) |
|---------------------------------------|-----------------|------------------|-----------------|-----------------|------------------|
| E <sub>elec</sub>                     | 294.6(50.0)     | 315.8(41.0)      | 327.4(39.8)     | 381.2(54.5)     | 395.5(59.3)      |
| E <sub>vdw</sub>                      | -207.1(9.0)     | -204.9(8.6)      | -206.5(8.9)     | -202.9(11.3)    | -208.6(11.1)     |
| E <sub>int</sub>                      | 1028.1(20.7)    | 1038.9(18.2)     | 1031.2(19.9)    | 1028.4(21.3)    | 1028.2(21.6)     |
| E <sub>MM</sub>                       | 1115.6(53.9)    | 1149.8(41.3)     | 1152.1(44.7)    | 1206.7(53.5)    | 1215.1(60.0)     |
| G <sub>nonpolar</sub>                 | 19.4(0.2)       | 19.5(0.2)        | 19.4(0.2)       | 19.3(0.4)       | 19.1(0.2)        |
| G <sub>PB</sub>                       | --5716.5(48.3)  | -5738.6(38.7)    | -5746.6(37.4)   | -5708.7(50.4)   | -5721.7(57.3)    |
| G <sub>sol</sub>                      | -5697.1(48.4)   | -5719.1(38.7)    | -5727.2(37.4)   | -5689.4(50.3)   | -5702.6(57.4)    |
| <G <sub>PB</sub> +E <sub>elec</sub> > | -5421.9(9.5)    | -5422.8(10.3)    | -5419.3(11.3)   | -5327.5(12.9)   | -5326.3(13.1)    |
| <E <sub>MM</sub> +G <sub>sol</sub> >  | -4581.5(19.6)   | -4569.4(18.9)    | -4575.1(17.3)   | -4482.7(19.5)   | -4487.5(17.8)    |
| -TS                                   | 577.9(3.3)      | 582.6(3.0)       | 574.0(3.2)      | 577.3(3.1)      | 577.3(3.1)       |
| G <sub>tot</sub>                      | -5159.4(22.8)   | -5152.0(22.0)    | -5149.1(20.5)   | -5060.0(22.6)   | -5060.8(20.3)    |

<sup>a</sup>: E<sub>elec</sub> : electrostatic energy, E<sub>vdw</sub> : van der Waals energy, E<sub>int</sub> : internal energy, E<sub>MM</sub> : molecular mechanical energy, G<sub>nonpolar</sub> : nonpolar solvation free energy, G<sub>PB</sub> : electrostatic solvation free energy, G<sub>sol</sub> : total solvation free energy, -TS: the product of temperature (K) and entropy, G<sub>tot</sub> : total free energy. The standard deviations are given in parentheses.

### **Molecular Dynamics Protocol:**

MD simulations were carried out with the SANDER module from the AMBER 8.0 suite (53). The cutoff value of the nonbonded interactions was set at 9.0 Å. The SHAKE algorithm (65) was employed to constrain bonds involving hydrogen with a tolerance of  $10^{-6}$  Å. A 2 fs time step was used in the dynamics simulations, and the translational motion of the center of mass was removed every 1 ps (63). Visual inspection of the trajectories revealed no abnormal overall rotation of the DNA duplexes, indicating that energy leakage from the internal motion to global rotation through the “flying ice cube effect” (63) was not contributing in this case. The particle mesh Ewald (PME) method (61, 62) was applied to treat long range electrostatic interactions. To neutralize the solute, 20 Na<sup>+</sup> counterions were added to the system with the LEAP module. The system was solvated by adding a rectangular box of TIP3P water (64) 10 Å from the boundary of the DNA in each direction. The sizes of the box and the numbers of water molecules added to the system are shown in Table S4.

To relax the solvent, the solute DNA was held fixed by 25 kcal/mol restraints, and the system was minimized with 1000 steps of steepest descent minimization. This was followed by a 25ps MD simulation with the same constraints on the DNA under constant volume. At this stage, the temperature was raised from 10 K to 300 K during the first 20 ps, using the Berendsen coupling algorithm (60) with a coupling parameter of 1.0 ps. Then, 5 rounds of minimization with 600 steps of steepest descent minimization in each round were performed to uniformly decrease the restraints on the DNA from 25 kcal/mol to 0 kcal/mol (66). Next, a 60 ps MD simulation was applied to equilibrate the system under constant volume, with the temperature raised uniformly from 10 K to

300 K in the first 40 ps. Finally, an MD simulation of 8 ns was carried out under constant pressure for data production.

### **MM-PBSA Protocol:**

We employed the following standard protocol: First, solvent and counterions were removed from the system. Then, 100 snapshots were extracted at 15 ps intervals from the trajectory window of 1.5 – 3.0 ns. These were employed to compute individual molecular mechanical energies ( $E_{MM}$ ) and solvation free energies ( $G_{solvation}$ ), and then to obtain their average values. The same force field and parameters (53-55) used in the MD simulations was applied to calculate the molecular mechanical energies ( $E_{MM}$ ), but without cutoff for nonbonded interactions. To calculate the  $G_{PB}$ , we used a grid spacing of 0.5 Å with a cubic lattice in which the largest linear dimension of the molecule occupied 80% of the lattice. The dielectric constants were set to 1 and 80 for the gas and solution phases, respectively. To consider the effect of salt on the solvation free energy, we added a physiological 0.15 M salt concentration. Partial charges employed were the same set as for the MD simulation. For the  $G_{PB}$  calculation, we carried out 300 iterations using the linear PB equation followed by 1000 iterations with non-linear PB equation (85). To calculate the  $G_{nonpolar}$ , we applied the PARSE parameter set for atomic radii, and used a probe radius of 1.4 Å to define the dielectric boundary (82). To calculate the solute entropy, we employed the following strategy: first, we energy-minimized each of the 100 snapshots from the MD trajectory using 1000 steps of steepest descent followed by conjugate gradient until the RMSD of the Cartesian elements of the gradient converged to less than  $10^{-4}$  kcal/(mol<sup>-1</sup> · Å). The dielectric constant was set to be 4r (where r is the interatomic distance in Å) to mimic the solution environment (85). Then, we selected five

minimized structures to compute the entropy with the NMODE module of the AMBER 8.0 suite and averaged the resultant values.
